# Supplementary material for: Inherently explainable deep neural network-based interpretation of electrocardiograms using variational auto-encoders
Source: bioRxiv or medRxiv preprint supplement (doi:10.1101/2022.01.04.22268759), 2022-01-05

I

II

V1

V3

V6

1

5

6

8

9

10

11

12

13

15

16

17

19

22

23

25

26

27

30

31

32

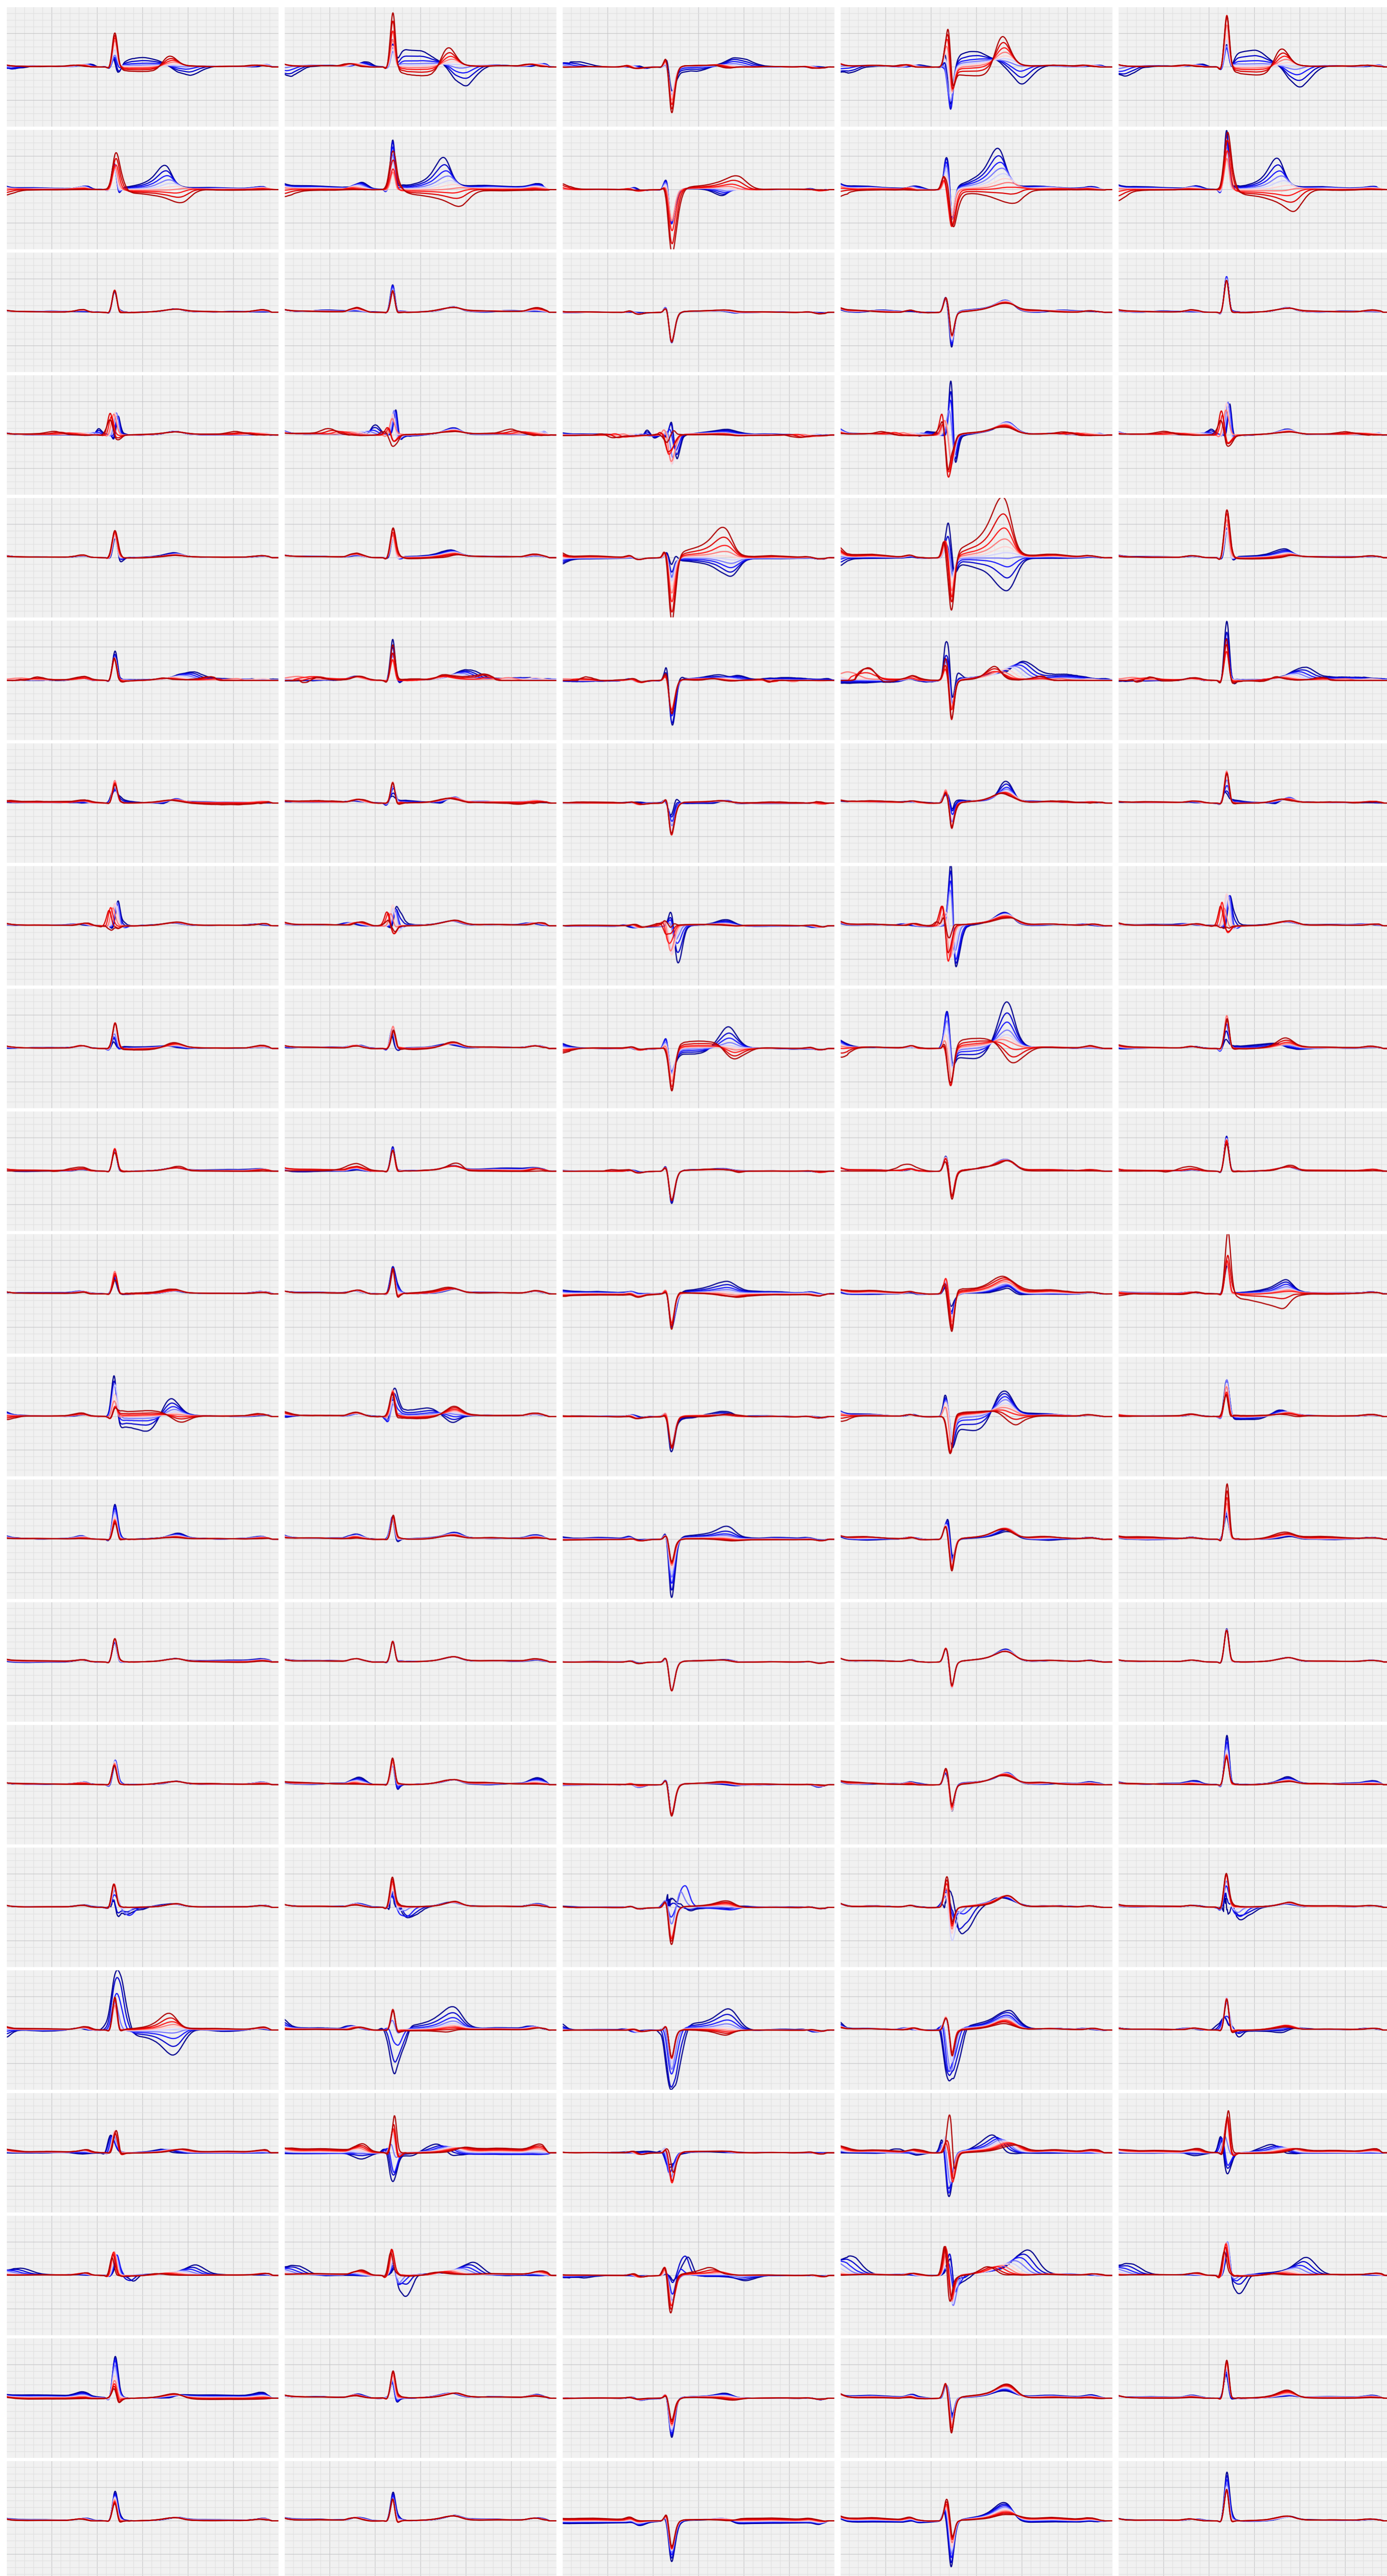

Supplement: Supplementary file [file media-3.pdf]
